# Supplementary material
Source: MDPI journal article supplement (https://www.mdpi.com/1424-8247/15/10/1188)
Supplement: s1 [file s1]

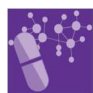

## Article

# Tablets made from paper - an industrially feasible approach

Ayat Abdelkader <sup>1,2,\*\*</sup>, Christoph Moos <sup>3,\*\*</sup>, Adrien Pelloux <sup>4</sup>, Marcus Pfeiffer <sup>3</sup>, Christian Alter <sup>3</sup>, Stefan Kolling <sup>3</sup> and Cornelia M. Keck <sup>1,\*</sup>

<sup>1</sup> Department of Pharmaceutics and Biopharmaceutics, Philipps-Universität Marburg, Robert-Koch-Str. 4, 35037 Marburg, Germany

<sup>2</sup> Assiut International Center of Nanomedicine, Al-Rajhy Liver Hospital, Assiut University, 71515 Assiut, Egypt

<sup>3</sup> Institute of Mechanics and Materials, Technische Hochschule Mittelhessen, Wiesenstr. 14, 35390 Giessen, Germany

<sup>4</sup> MEDELPHARM, Science Lab, rue du Chat Botté 615, 01700 Beignost, France

\* Correspondence: e-mail@e-mail.com; Tel.: (optional; include country code; if there are multiple corresponding authors, add author initials)

\*\* contributed equally

## Supplementary Materials:

Table S1: Macro used for the determination of the Feret's diameter.

```
run("8-bit");
setAutoThreshold("Default");
//run("Threshold...");
//setThreshold(0, 180);
setOption("BlackBackground", false);
run("Convert to Mask");

run("Analyze Particles...", "size=0.09-Infinity show=Masks display");
```
